# Supplementary material for: Binding of the anticancer alkaloid sanguinarine to double stranded RNAs: Insights into the structural and energetics aspects
Source: Royal Society of Chemistry journal article supplement (doi:10.1039/b927001a), 2010-05-04
Supplement: b927001a_tables1.pdf [file b927001a_tables1.pdf]

**Table 1 ESI** Summary of the optical properties of free and RNA bound sanguinarine<sup>a</sup>

| Parameter                                            | poly(A).poly(U) | poly(I).poly(C) | poly(C).poly(G) |
|------------------------------------------------------|-----------------|-----------------|-----------------|
| Absorbance                                           |                 |                 |                 |
| $\lambda_{\max}$ (free)                              | 327             | 327             | 327             |
| $\lambda_{\max}$ (bound)                             | 337             | 336             | 335             |
| $\lambda_{\text{iso}}^{\text{b}}$                    | 347, 372, 496   | 344, 368, 496   | 354, 370, 502   |
| $\epsilon_{\text{f}}$ (at $\lambda_{\max}$ )         | 30,700          | 30,700          | 30,700          |
| $\epsilon_{\text{b}}$ (at $\lambda_{\max}$ )         | 17,430(327)     | 18,825(327)     | 15,340(327)     |
| $\epsilon_{\text{iso}}$ (at $\lambda_{\text{iso}}$ ) | 18,760          | 23,700          | 12,195(354)     |
| Fluorescence                                         |                 |                 |                 |
| $\lambda_{\max}$ (excitation)                        | 475             | 475             | 475             |
| $\lambda_{\max}$ (emission)                          | 565             | 565             | 565             |
| $F_{\text{b}}/F_{\text{o}}$                          | 4.69            | 0.27            | 4.46            |

<sup>a</sup>Units:  $\lambda$  nm;  $\epsilon$  (molar extinction coefficient)  $\text{M}^{-1} \text{cm}^{-1}$ . <sup>b</sup>Wavelengths at the isosbestic points. <sup>c</sup> $F_{\text{o}}$  and  $F_{\text{b}}$  are the fluorescence intensities of the free and completely bound sanguinarine at 565 nm in each case.
